# Supplementary material for: Hemostatic Alginate/Nano-Hydroxyapatite Composite Aerogel Loaded with Tranexamic Acid for the Potential Protection against Alveolar Osteitis
Source: MDPI journal article supplement (doi:10.3390/pharmaceutics14102255), 2022-10-21
Supplement: s1 [file s1]

# **Hemostatic Alginate/Nano-Hydroxyapatite Composite Aerogel Loaded with Tranexamic Acid for the Potential Protection against Alveolar Osteitis**

Mai El Halawany<sup>1\*</sup>, Randa Latif<sup>1</sup>, Mohamed H.H. AbouGhaly<sup>1,2</sup>

<sup>1</sup>Department of Pharmaceutics and Industrial Pharmacy, Faculty of Pharmacy, Cairo University

<sup>2</sup>Department of Pharmaceutics and Industrial Pharmacy, School of Pharmacy, Newgiza University

\*Corresponding author at: Department of Pharmaceutics and Industrial Pharmacy, Faculty of Pharmacy, Cairo University, Kasr El-Ainy Street, Cairo 11562, Egypt.

E-mail : mai.elhalawany@pharma.cu.edu.eg

Tel: +2 01008463596

Fax: +2 02 23628246

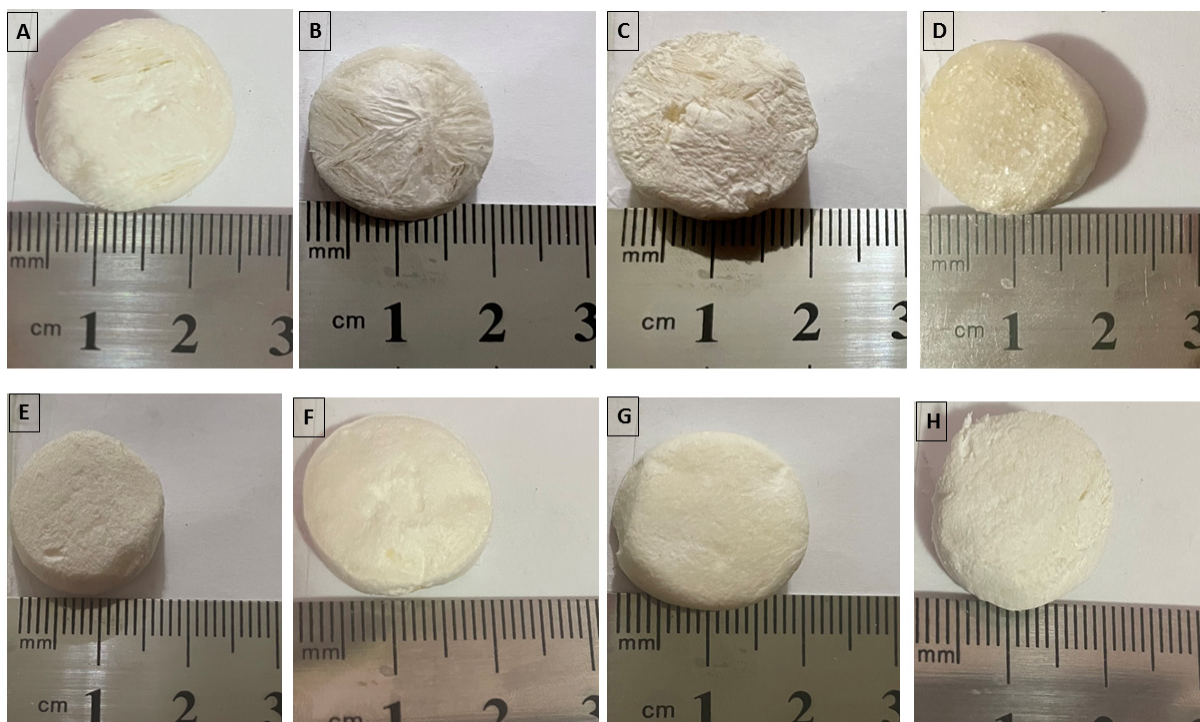

**Figure S1: Alginate/Nano-hydroxyapatite composite aerogels loaded with tranexamic acid after lyophilization where (A) A<sub>2</sub>H<sub>1</sub> [2% alginate and 1% Nano-hydroxyapatite], (B) A<sub>3</sub>H<sub>1</sub> [3% alginate and 1% Nano-hydroxyapatite] (C) A<sub>2</sub>H<sub>1</sub>Ca [2% alginate crosslinked with 0.5M CaCl<sub>2</sub> and 1% Nano-hydroxyapatite], (D) A<sub>3</sub>H<sub>1</sub>Ca [3% alginate crosslinked with 0.5M CaCl<sub>2</sub> and 1% Nano-hydroxyapatite], (E) A<sub>3</sub>H<sub>5</sub> [3% alginate and 5% Nano-hydroxyapatite], (F) A<sub>2</sub>H<sub>5</sub> [2% alginate and 5% Nano-hydroxyapatite], (G) A<sub>3</sub>H<sub>5</sub>Ca [3% alginate crosslinked with 0.5M CaCl<sub>2</sub> and 5% Nano-hydroxyapatite], (H) A<sub>2</sub>H<sub>5</sub>Ca [2% alginate crosslinked with 0.5M CaCl<sub>2</sub> and 5% Nano-hydroxyapatite].**

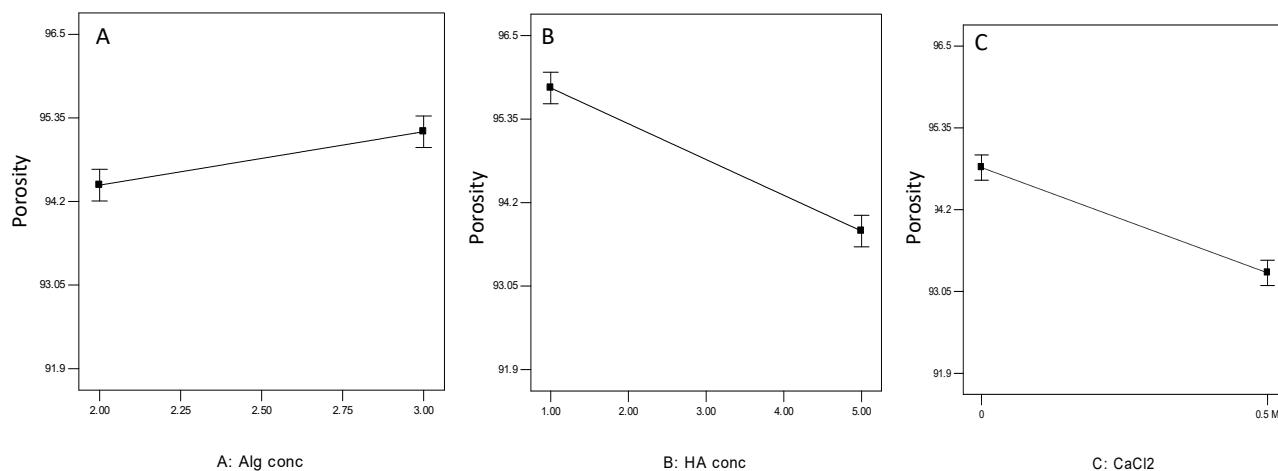

**Figure S2: Effects of (A) alginate concentration, (B) nano-hydroxyapatite concentration, and (C) the addition of CaCl<sub>2</sub> on the porosity of the prepared alginate/nano-hydroxyapatite composite aerogels loaded with tranexamic acid.**

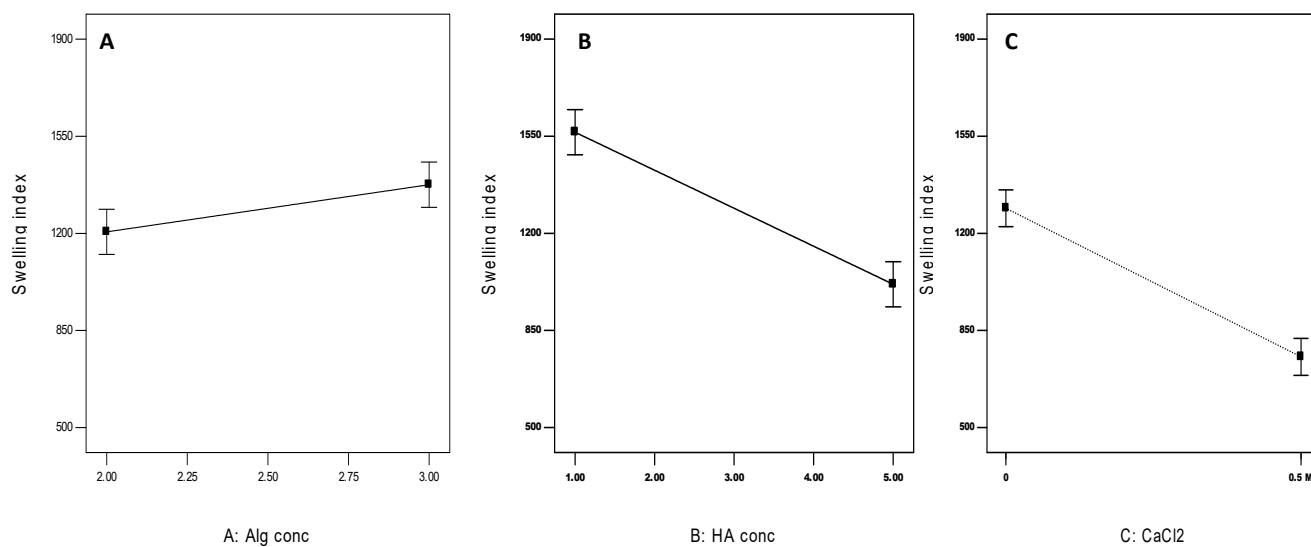

**Figure S3: Effects of (A) alginate concentration, (B) nano-hydroxyapatite concentration, and (C) the addition of CaCl<sub>2</sub> on the swelling index of the prepared alginate/nano-hydroxyapatite composite aerogels loaded with tranexamic acid.**

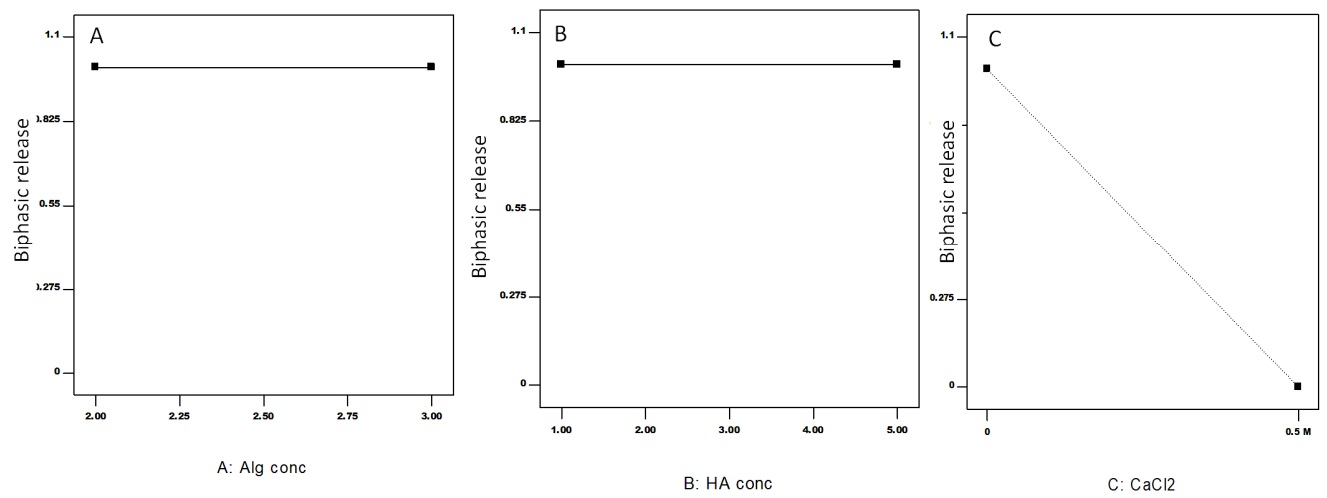

**Figure S4: Effects of (A) alginate concentration, (B) nano-hydroxyapatite concentration, and (C) the addition of CaCl<sub>2</sub> on the release pattern of the prepared alginate/nano-hydroxyapatite composite aerogels loaded with tranexamic acid.**

**Table S1: Kinetics parameters of the prepared alginate/nano-hydroxyapatite composite aerogels loaded with tranexamic acid.**

| <b>Prepared aerogels with biphasic release profile</b> |                                |                       |                      |                                 |                          |                                   |                                  |                                 |                      |                                   |                          |                                   |
|--------------------------------------------------------|--------------------------------|-----------------------|----------------------|---------------------------------|--------------------------|-----------------------------------|----------------------------------|---------------------------------|----------------------|-----------------------------------|--------------------------|-----------------------------------|
| <b>Code</b>                                            | <b>First phase (0 to 1 hr)</b> |                       |                      |                                 |                          |                                   | <b>Second phase (1 to 4 hrs)</b> |                                 |                      |                                   |                          |                                   |
|                                                        | <b>Zero order</b>              |                       | <b>First order</b>   |                                 | <b>Higuchi diffusion</b> |                                   | <b>Zero order</b>                |                                 | <b>First order</b>   |                                   | <b>Higuchi diffusion</b> |                                   |
|                                                        | <b>r<sup>2</sup></b>           | <b>K<br/>(mg/min)</b> | <b>r<sup>2</sup></b> | <b>K<br/>(min<sup>-1</sup>)</b> | <b>r<sup>2</sup></b>     | <b>K<br/>(mg/min<sup>½</sup>)</b> | <b>r<sup>2</sup></b>             | <b>K<br/>(min<sup>-1</sup>)</b> | <b>r<sup>2</sup></b> | <b>K<br/>(mg/min<sup>½</sup>)</b> | <b>r<sup>2</sup></b>     | <b>K<br/>(mg/min<sup>½</sup>)</b> |
| <b>A<sub>2</sub>H<sub>1</sub></b>                      | 0.945                          | 0.782                 | 0.988                | 0.017                           | <u>0.991</u>             | <u>8.16</u>                       | <u>0.989</u>                     | <u>0.126</u>                    | 0.933                | 0.011                             | 0.963                    | 1.658                             |
| <b>A<sub>2</sub>H<sub>5</sub></b>                      | 0.821                          | 0.781                 | 0.895                | 0.016                           | <u>0.927</u>             | <u>8.47</u>                       | <u>0.99</u>                      | <u>0.145</u>                    | 0.921                | 0.0108                            | 0.926                    | 1.85                              |
| <b>A<sub>3</sub>H<sub>1</sub></b>                      | 0.891                          | 0.581                 | 0.94                 | 0.012                           | <u>0.96</u>              | <u>6.18</u>                       | <u>0.99</u>                      | <u>0.17</u>                     | 0.89                 | 0.014                             | 0.941                    | 2.27                              |
| <b>A<sub>3</sub>H<sub>5</sub></b>                      | 0.919                          | 0.752                 | 0.976                | 0.015                           | <u>0.98</u>              | <u>7.94</u>                       | <u>0.937</u>                     | <u>0.155</u>                    | 0.812                | 0.0103                            | 0.751                    | 1.85                              |

  

| <b>Prepared aerogels with monophasic release profile</b> |                      |                       |                      |                                 |                          |                                   |
|----------------------------------------------------------|----------------------|-----------------------|----------------------|---------------------------------|--------------------------|-----------------------------------|
| <b>Code</b>                                              | <b>Zero order</b>    |                       | <b>First order</b>   |                                 | <b>Higuchi diffusion</b> |                                   |
|                                                          | <b>r<sup>2</sup></b> | <b>K<br/>(mg/min)</b> | <b>r<sup>2</sup></b> | <b>K<br/>(min<sup>-1</sup>)</b> | <b>r<sup>2</sup></b>     | <b>K<br/>(mg/min<sup>½</sup>)</b> |
| <b>A<sub>2</sub>H<sub>1</sub>Ca</b>                      | 0.932                | 1.169                 | 0.953                | 0.087                           | <u>0.963</u>             | <u>12.129</u>                     |
| <b>A<sub>2</sub>H<sub>5</sub>Ca</b>                      | 0.959                | 0.556                 | 0.911                | 0.05                            | <u>0.997</u>             | <u>7.706</u>                      |
| <b>A<sub>3</sub>H<sub>1</sub>Ca</b>                      | 0.891                | 0.529                 | 0.967                | 0.033                           | <u>0.979</u>             | <u>7.532</u>                      |
| <b>A<sub>3</sub>H<sub>5</sub>Ca</b>                      | 0.931                | 0.519                 | 0.975                | 0.028                           | <u>0.989</u>             | <u>7.261</u>                      |

Underlined numbers indicate highest Coefficient of determination (r<sup>2</sup>), K: release rate constant

## Fourier transform infrared spectroscopy

The spectrum of SA (Figure S5A) shows –OH stretching vibration at  $3422\text{ cm}^{-1}$ , –CH stretching vibration at  $2912\text{ cm}^{-1}$ , and asymmetric and symmetrical stretching vibration peaks of the carboxyl group at  $1612\text{ cm}^{-1}$  and  $1415\text{ cm}^{-1}$ , respectively. The C–O–C stretching vibrations appeared at  $1029\text{ cm}^{-1}$ .

The spectrum of Nano-HA (Figure S5B) showed the bending peak of the phosphate group at  $570\text{ cm}^{-1}$ . The O–P–O bending of the phosphate group appeared at  $601\text{ cm}^{-1}$  and the asymmetric stretching band of the phosphate bonds (P–O) was observed at  $1053\text{ cm}^{-1}$  [1].

The spectrum of TXA (Figure S5C) showed the CH<sub>2</sub> stretching wide band of aliphatic groups at  $2990$  and  $2484\text{ cm}^{-1}$ . The C=O stretching of -COOH peak is seen at  $1664\text{ cm}^{-1}$ . The peaks at  $1516\text{ cm}^{-1}$  can be assigned to the bending vibrations of the amino groups. The C–N in aliphatic amine peak is seen at  $1006\text{ cm}^{-1}$  and the C–C bond of the carbon ring has a peak at  $918\text{ cm}^{-1}$ . There are sharp absorption peaks at  $767\sim 524\text{ cm}^{-1}$  which are mainly caused by trans isomerism vibration [2,3].

The spectrum of A<sub>3</sub>H<sub>1</sub> (Figure S5D) showed almost all absorption bands of the 3 components. Where, the wide peak at  $3414\text{ cm}^{-1}$  was assigned to overlapping of surface hydroxyl groups and amino group that belongs to SA and TXA, respectively. Moreover, the observed bands about  $1612$  and  $1387\text{ cm}^{-1}$  are attributed to symmetric and asymmetric stretching peaks of alginate carboxylate anions but they were slightly shifted and weakened because of partial crosslinking of Ca<sup>+2</sup> ions to carboxylate groups [4]. The CH<sub>2</sub> stretching of aliphatic groups of TXA have been shifted slightly to  $2935\text{ cm}^{-1}$ . The characteristic sharp peak at  $1037\text{ cm}^{-1}$  was assigned to the combination of phosphate group stretching of Nano-HA and C–O–C stretching of SA and the bending peak of phosphate group in Nano-HA structure appeared at  $570\text{ cm}^{-1}$ .

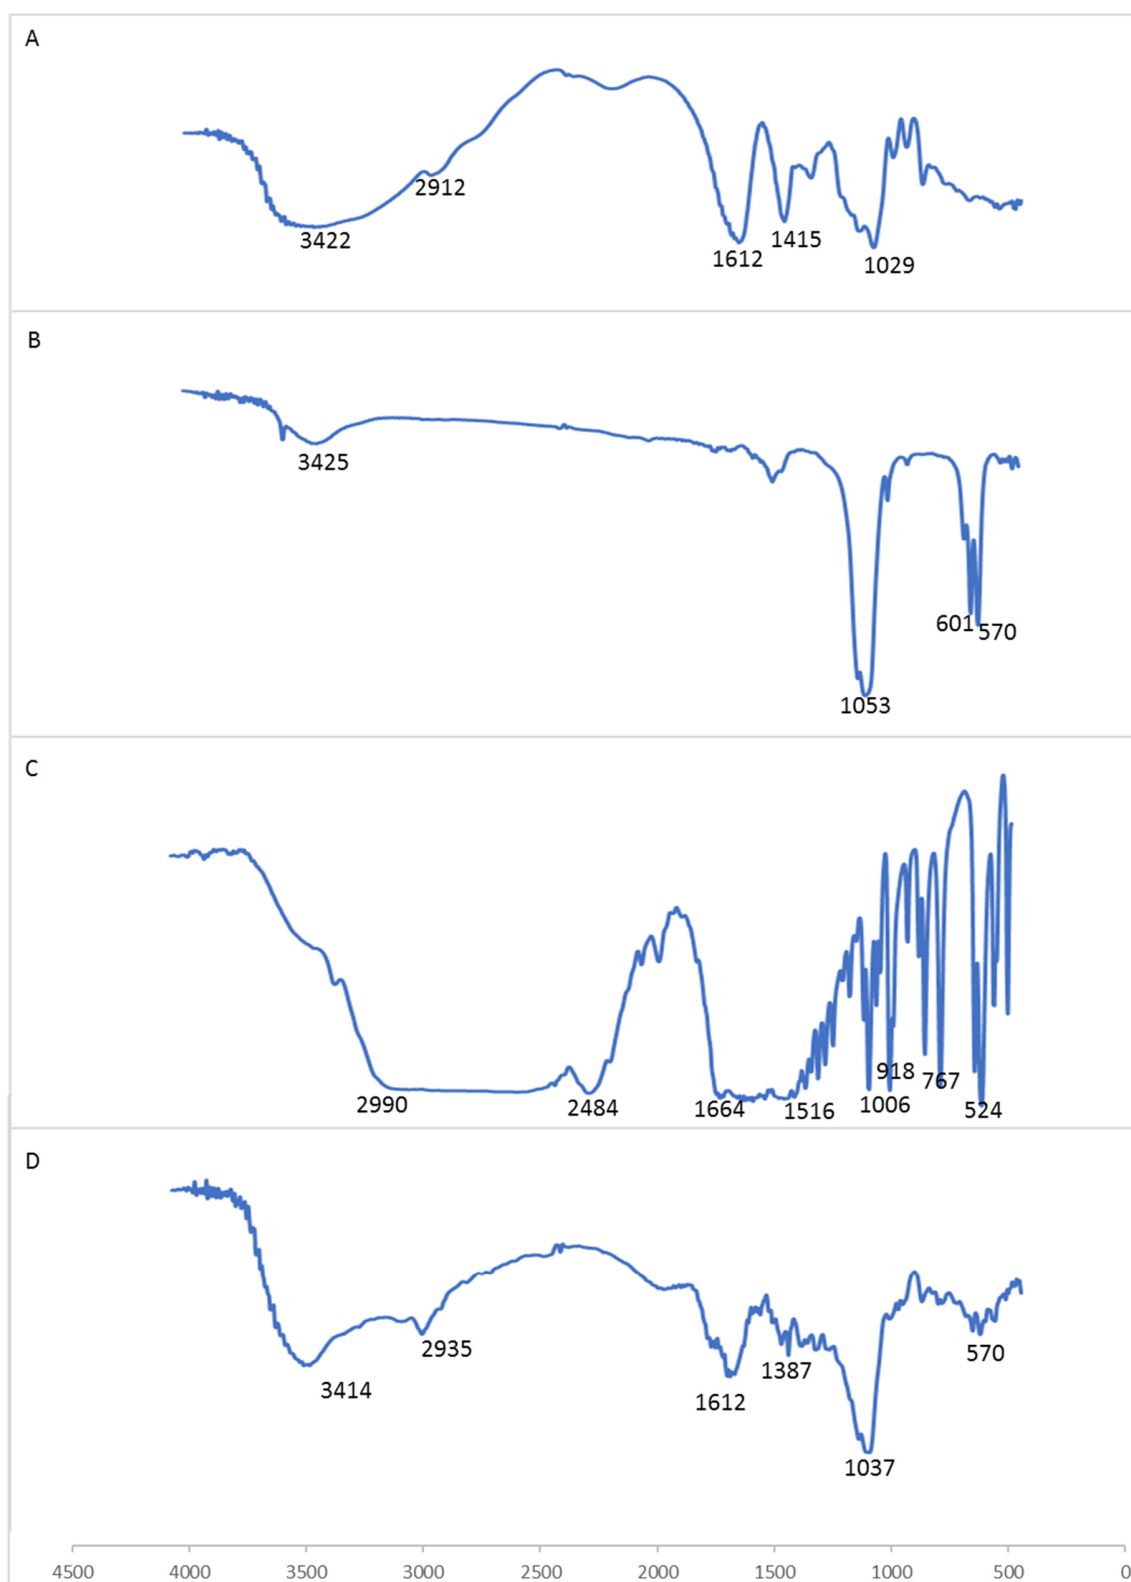

**Figure S5: FTIR spectra of (A) sodium alginate, (B) nano-hydroxyapatite, (C) tranexamic acid, (D) A<sub>3</sub>H<sub>1</sub> aerogel.**

## References

- [1] Rajkumar, M.; Meenakshisundaram, N.; Rajendran, V. Development of nanocomposites based on hydroxyapatite/sodium alginate: Synthesis and characterisation. *Mater Character* **2011**, *62*, 469-479, doi:10.1016/j.matchar.2011.02.008.
- [2] Zhong, Q.-K.; Wu, Z.-Y.; Qin, Y.-Q.; Hu, Z.; Li, S.-D.; Yang, Z.-M.; Li, P.-W. Preparation and Properties of Carboxymethyl Chitosan/Alginate/Tranexamic Acid Composite Films. *Membranes* **2019**, *9*, 11, doi:10.3390/membranes9010011.
- [3] Jin, H.-H.; Kim, D.-H.; Kim, T.-W.; Shin, K.-K.; Jung, J.S.; Park, H.-C.; Yoon, S.-Y. In vivo evaluation of porous hydroxyapatite/chitosan–alginate composite scaffolds for bone tissue engineering. *Int J Biol Macromol* **2012**, *51*, 1079-1085, doi:10.1016/j.ijbiomac.2012.08.027.
- [4] Gholizadeh, B.S.; Buazar, F.; Hosseini, S.M.; Mousavi, S.M. Enhanced antibacterial activity, mechanical and physical properties of alginate/hydroxyapatite bionanocomposite film. *Int J Biol Macromol* **2018**, *116*, 786-792, doi:10.1016/j.ijbiomac.2018.05.104.
